# Supplementary material for: Functional brain architecture is associated with the rate of tau accumulation in Alzheimer’s disease
Source: PubMed Central journal article supplement (PMC6969065; doi:10.1038/s41467-019-14159-1), 2020-01-17
Supplement: 41467_2019_14159_MOESM3_ESM.pdf [file 41467_2019_14159_MOESM3_ESM.pdf]

## **Description of Additional Supplementary Files**

File Name: Supplementary Code 1

Description: Example R-Markdown code to simulate connectivity-related tau spreading analyses
